# Supplementary material for: Reporters to mark and eliminate basal or luminal epithelial cells in culture and in vivo
Source: PLoS Biol. 2018 Jun 20;16(6):e2004049. doi: 10.1371/journal.pbio.2004049 (PMC6042798; doi:10.1371/journal.pbio.2004049)
Supplement: S3 Data — (XLSX) [file pbio.2004049.s013.xlsx]

## Sheet: Fig1C
Days	K14-GFP+	K14-GFP-
0	81.5	0.03
1
2
3
4
5
6
7	74.5	0.05
8
9
10
11	70.5	0.02
12
13
14	67	0.06
15
16	60.7	0.05
17
18	59.5	0.03
19
20
21	58.8	0.02
22
23
24
25	49.5	0.03
26
27
28	43.9	0.07
29
30	38	0.08
31
32	36.4	0.06
33
34
35	29.9	0.06
36
37	25.8	0.07
38
39	23.6	0.02
40
41
42	22.2	0.05
43
44	20.1	0.04
45
46	19.1	0.03
47
48
49
50
51	18.7	0.06
52
53	18.6	0.04

## Sheet: Fig.1E
Days	K14.GFP-			K14.GFP+			WT
1	0.35	0.659	0.659	0.35	0.518	0.656	0.318	0.674	0.707
2	2.09	3.18	2.6	2	2.805	2.55	2.33	3.075	2.6
3	8.23	8.65	6.7	7.97	7.1	5.54	9.76	8.45	7.4
4	10.1	9.25	7.3	9.65	10.35	8.4	10.7	8.5	8.8

## Sheet: FIG.1F
	Cell Cycle Phase	K14.GFP+			K14.GFP-
S-Phase		59.1	59.1	54.3	55	59.4	58.8
G0/G1		32.6	31.8	34.1	33	30.1	31
G2/M		5.28	6.27	7.6	8.27	6.29	6.14

## Sheet: Fig.1H
WT	WT DT	K14-GFP-	K14-GFP- DT	K14-GFP+	K14-GFP+ DT
50.3	52.6	10.5	9.4	62.3	19.1
33.3	30.3	6.4	9.7	52.3	23.3

## Sheet: Fig.2A
Day	Control								K14.GFP+								K14.GFP-
8	3	3	4	3	6	4	3	5	3	3	1	4	4.5	5	4.5		1	4	3	3	2	1.5	2	4
15	8	9	7	8	8.5	7.5	7.5	8.5	7	10	8	8	8	8	8		5	7	6	6	7	6	7	6.5
22	17	11	9	9	10	9	9	10	8	10	11	12	10	10.5	9.5		8	8	7	7	9	7	8	8.5
27	22	16	11	11	11	12	10.5	13	9	12	13	14	11	14.5	12.5		9	10	8	8	10	9	8.5	10

## Sheet: Fig.2B
Control	K14.GFP+	K14.GFP-
1.57	1.28	0.58
1.83	1.27	0.88
1.53	1.5	1.32
1.23	2.37	0.73
1.59	1.46	1.06
1.95	2.04	1.21
0.82	0.87	1.39
1.5		0.82

## Sheet: Fig.2C
Control	K14.GFP+	K14.GFP-
1.21	5.56	0.7
2.31	1.43	1.29
3.6	19.43	1.83
6.86	3.4	0.87
0.58	4.18	3.93
5.04	14.48	1.79
0.14	5.22	1.39
0.34		0.7

## Sheet: FIG.2E
Tumour Mass	Control	K14.GFP+	K14.GFP-
1.57	1.21
1.83	2.31
1.53	3.6
1.23	6.86
1.59	0.58
1.95	5.04
0.82	0.14
1.5	0.34
1.28		5.56
1.27		1.43
1.5		19.43
2.37		3.4
1.46		4.18
2.04		14.48
0.87		5.22
0.58			0.7
0.88			1.29
1.32			1.83
0.73			0.87
1.06			3.93
1.21			1.79
1.39			1.39
0.82			0.7

## Sheet: FIG2 F AND G
Ki67
	Total
	K14.GFP+	K14.GFP-
	47.0212	39.6873
	25.1177	27.136
	16.5397	14.7872
CC3
	Total
	K14.GFP+	K14.GFP-
	32.565	16.307
	46.651	42.622
	21.266	2.206

## Sheet: Fig.2H
	-DT								+DT
K14+	1.28	1.27	1.5	2.37	1.46	2.04	0.87		0.77	1.11	0.69	1.05
K14-	0.58	0.88	1.32	0.73	1.06	1.21	1.39	0.82	1.01	0.63	1.43	0.64

[truncated: 19 more sheets: FIg.2I, Fig.3D, Fig.3E, Fig.3F, Fig.5A, Fig.5B, Fig.5C, Fig.5D, Fig.5F, Fig.6A, Fig.6C, Fig.6F, S.Fig.1D, S.Fig.1E, S.Fig.2C, S.Fig.4A, S.Fig.4D, S.Fig.5A, S.Fig.5B]
